# Supplementary material for: Dysfunctional TLR1 reduces the therapeutic efficacy of chemotherapy by attenuating HMGB1-mediated antitumor immunity in locally advanced colorectal cancer
Source: PubMed Central journal article supplement (PMC10636035; doi:10.1038/s41598-023-46254-1), 2023-11-09

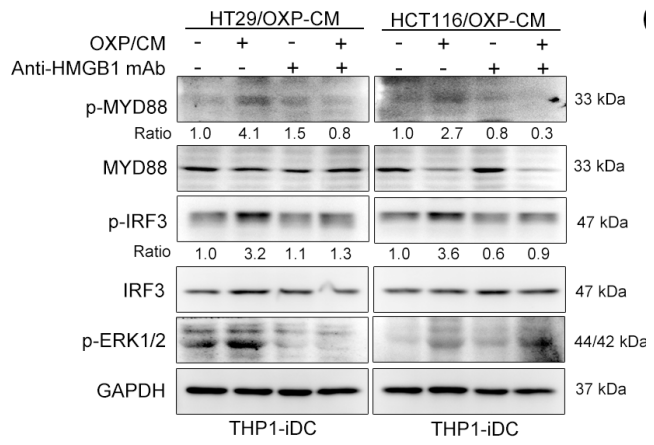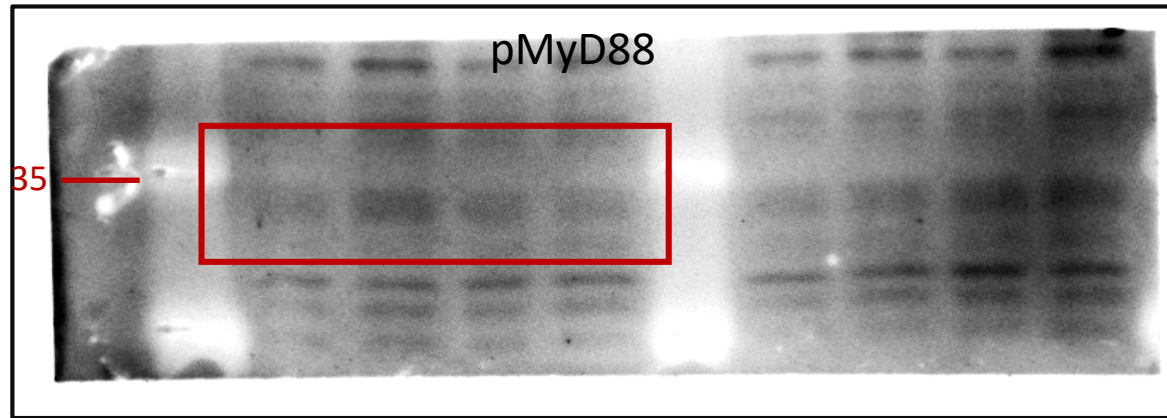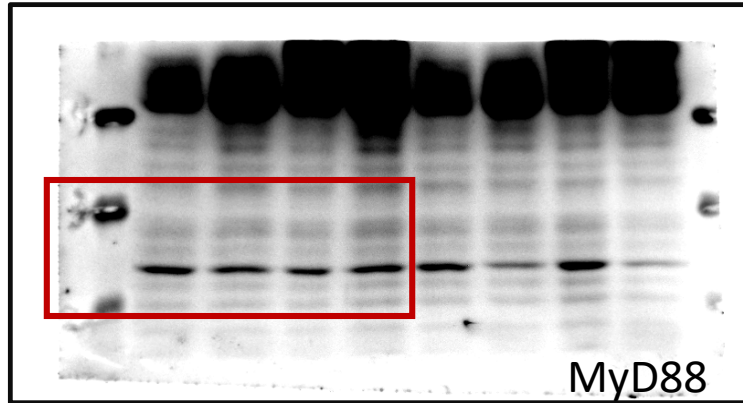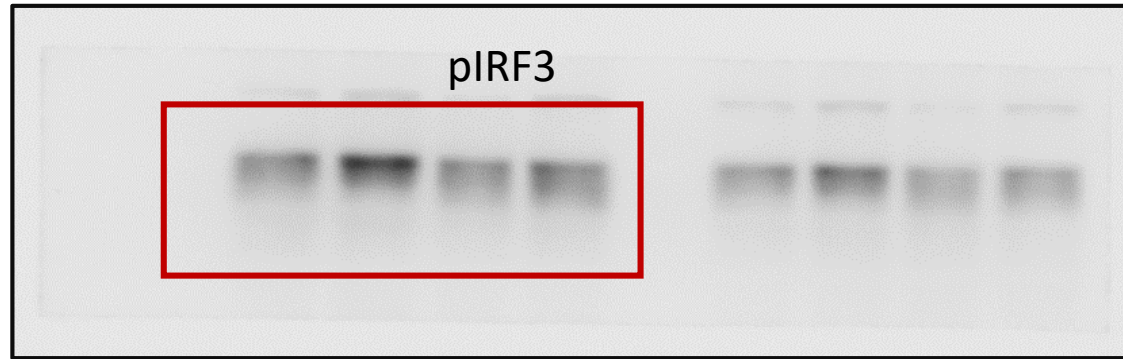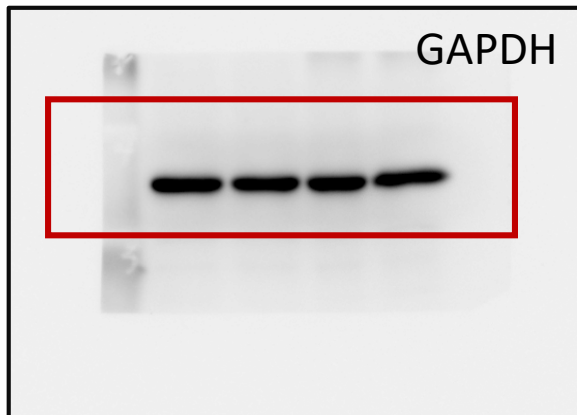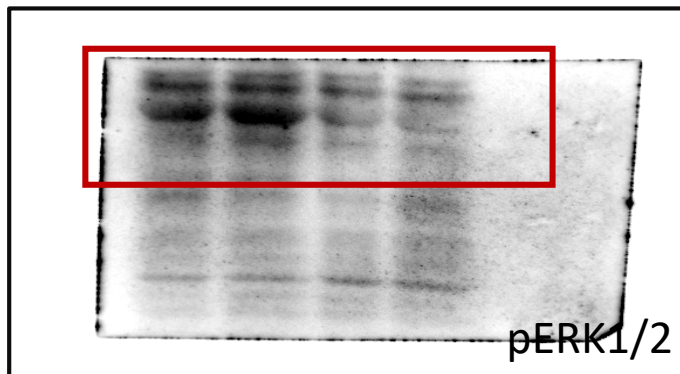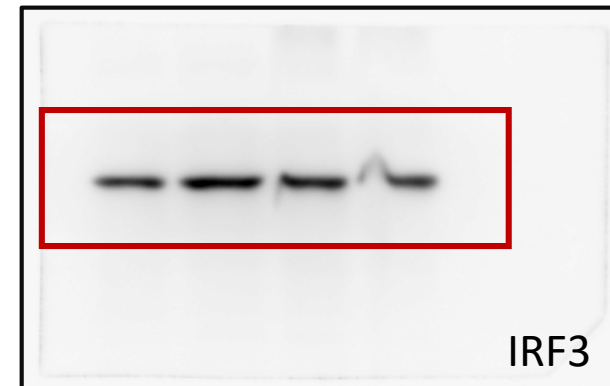

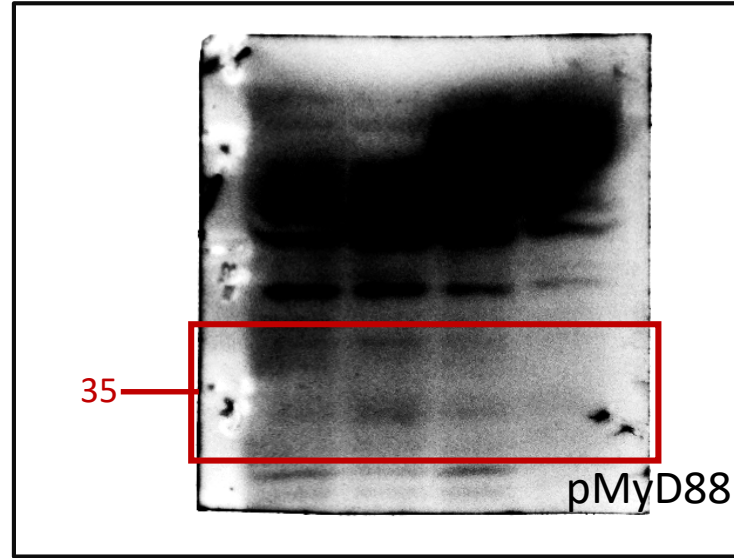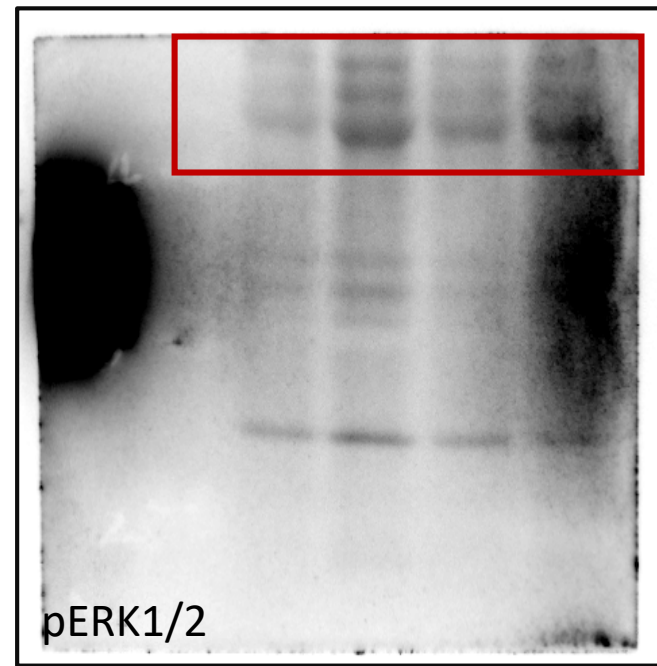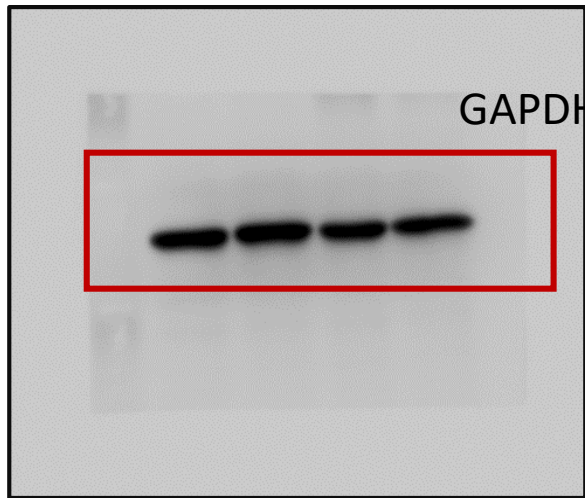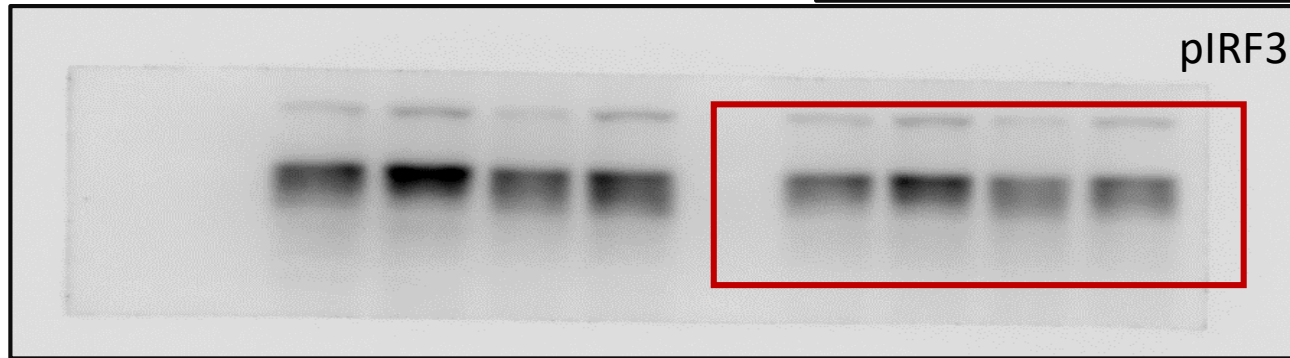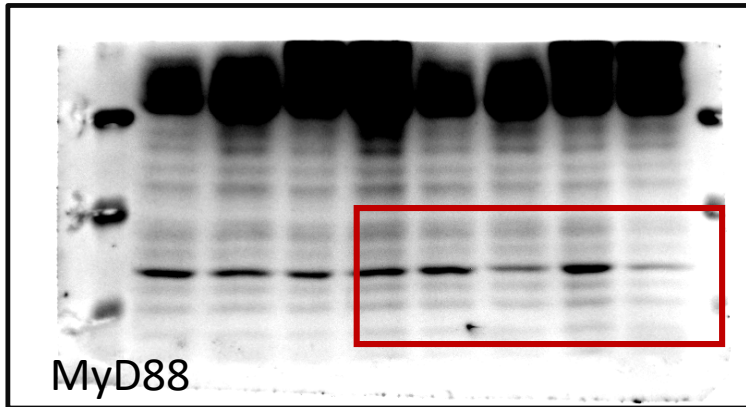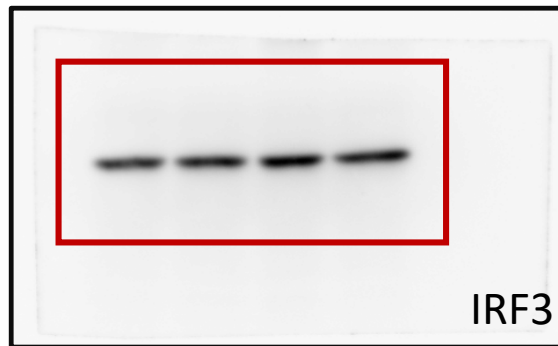

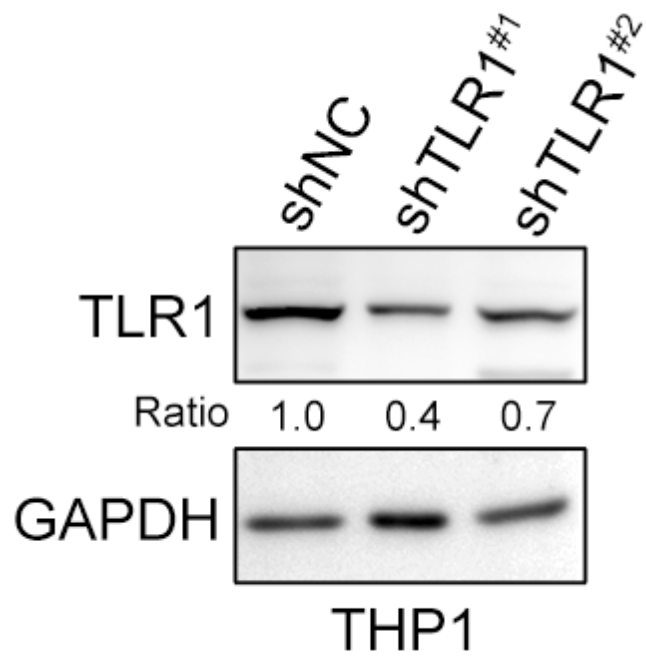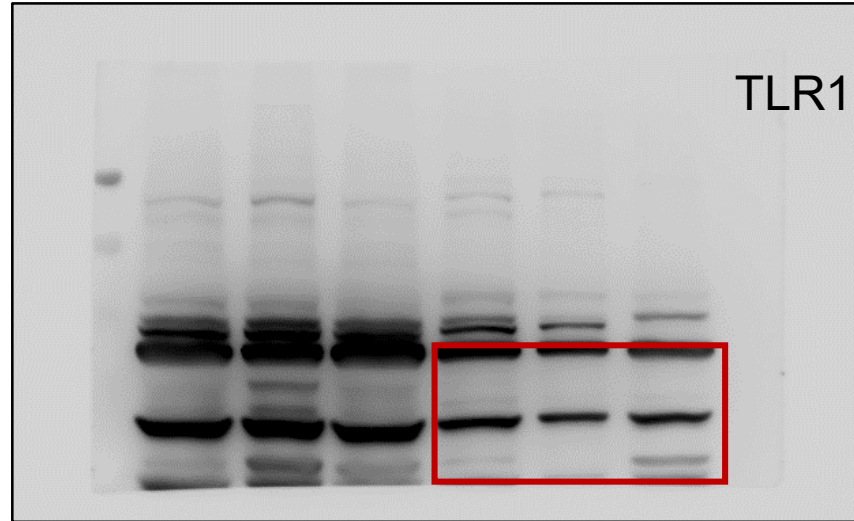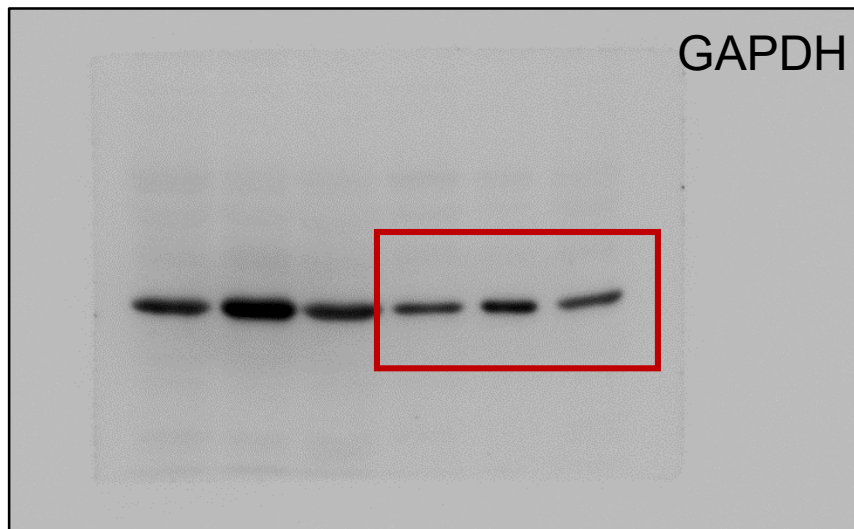

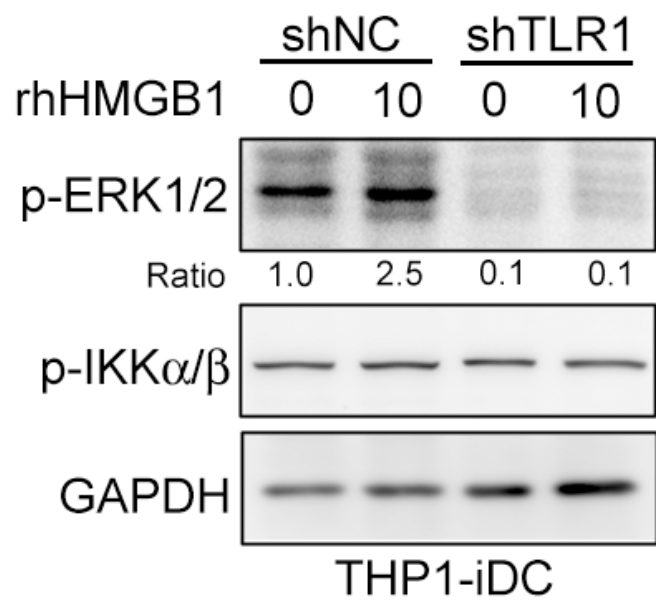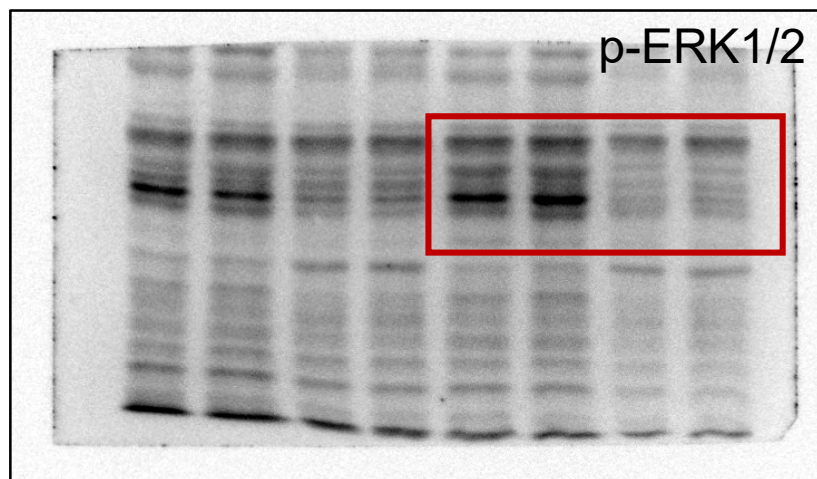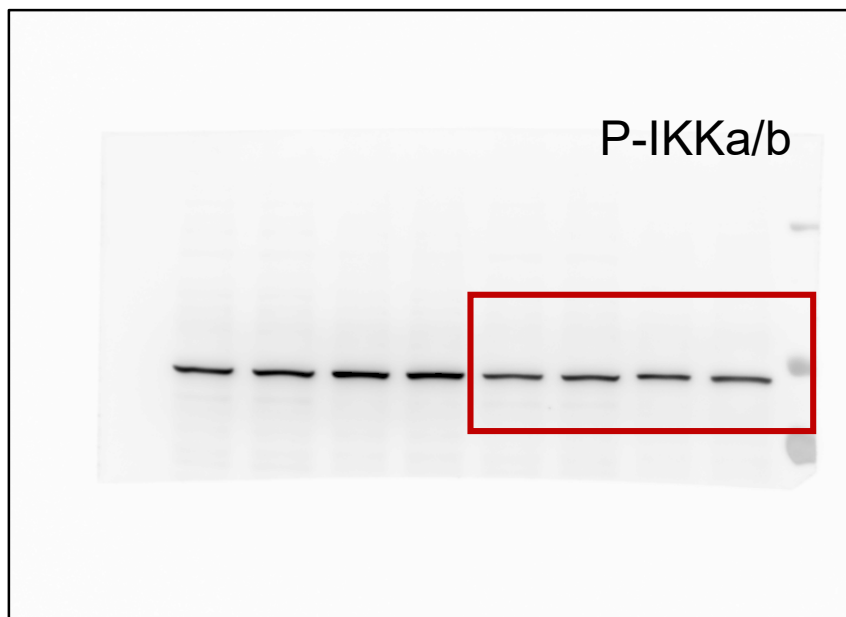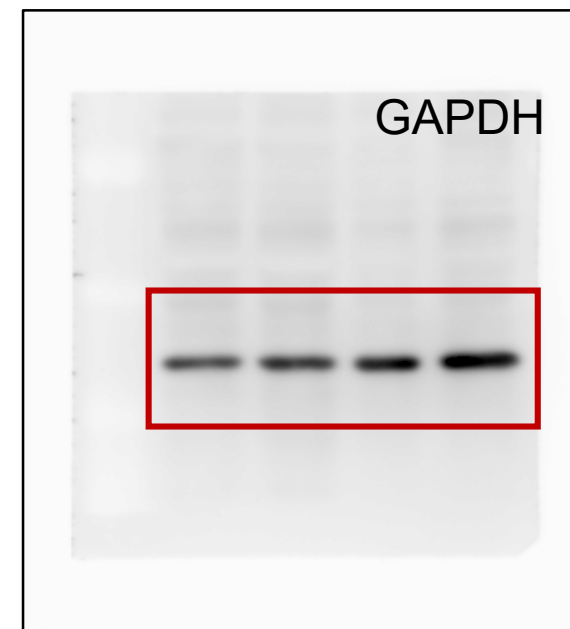

Supplement: 41598_2023_46254_MOESM1_ESM.pdf [file 41598_2023_46254_MOESM1_ESM.pdf]
